# Supplementary material for: RequestRodeo: Client Side Protection against Session Riding
Source: Royal Society of Chemistry journal article supplement (doi:10.1039/d4cp03580a), 2006-01-01
Supplement: d4cp03580a1.pdf [file d4cp03580a1.pdf]

## Supporting Information For

### “Extending the Chevrel-type superatoms to nitrogen family”

Ziyao Yang<sup>1</sup>, Ning Du<sup>1</sup>, Hongshan Chen<sup>1\*</sup>

<sup>1</sup> College of Physics and Electronic Engineering, Northwest Normal University, Lanzhou 730070, China

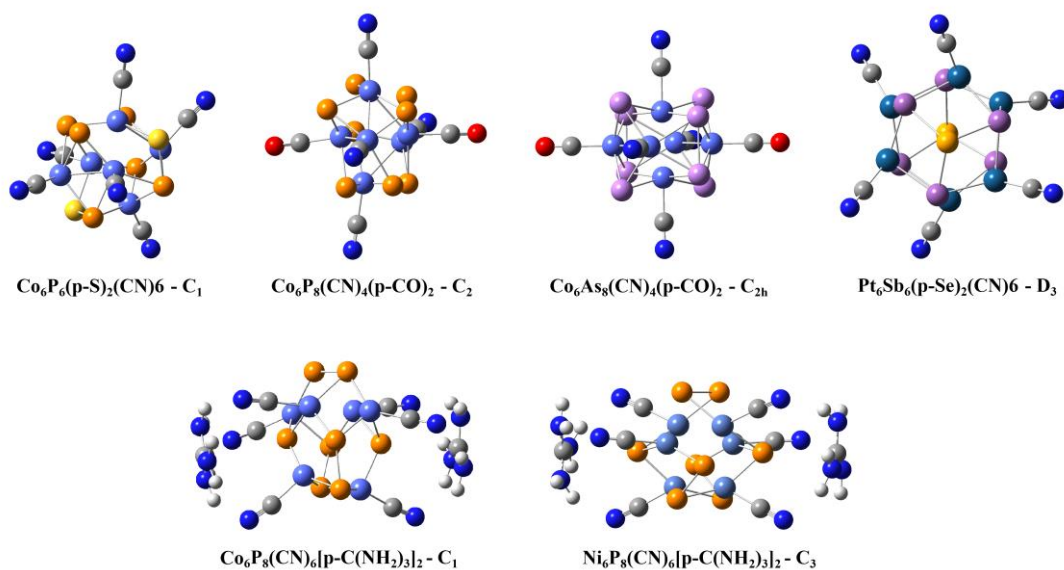

**Fig. S1.** Optimized stable structures of the neutral substitutions with low symmetry.

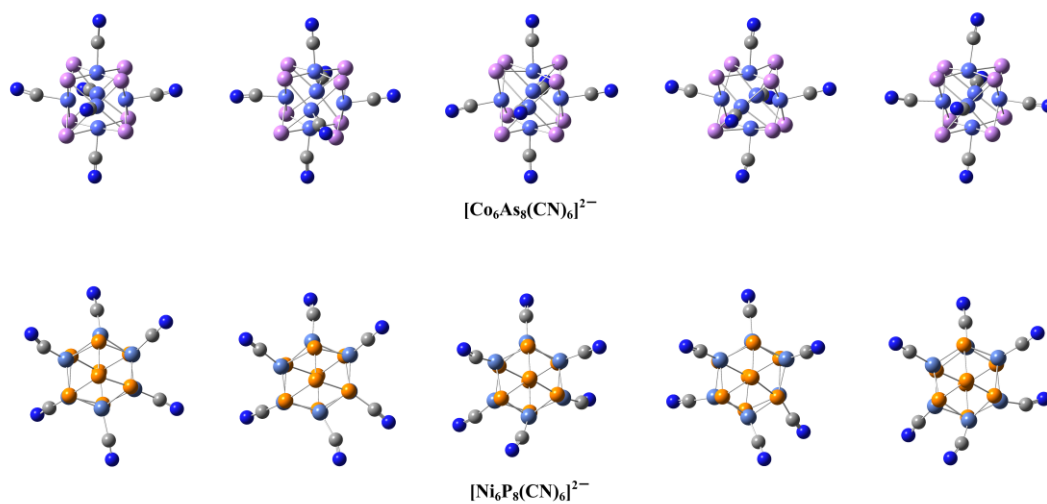

**Fig. S2.** The structures are snapshots at steps with smallest energies (the upper peaks at Fig. 3) in the last 2 ps, which correspond the most deformed geometries close the end of the MD simulations.

\*E-mail: chenhs@nwnu.edu.cn

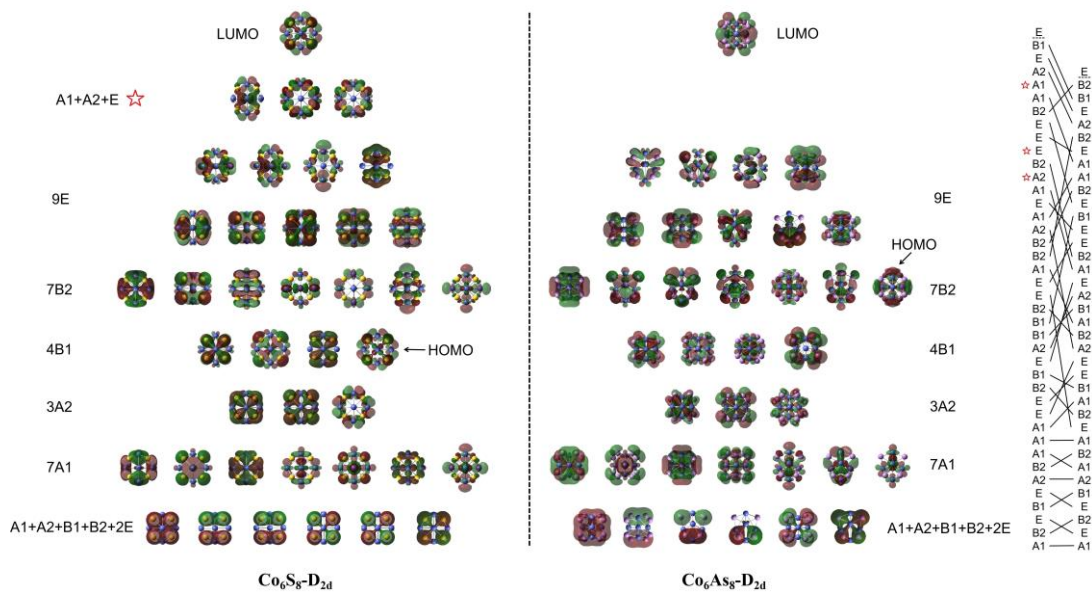

Fig. S3. Valence molecular orbitals of  $\text{Co}_6\text{S}_8$  and  $\text{Co}_6\text{As}_8$  cores with  $D_{2d}$  symmetry.

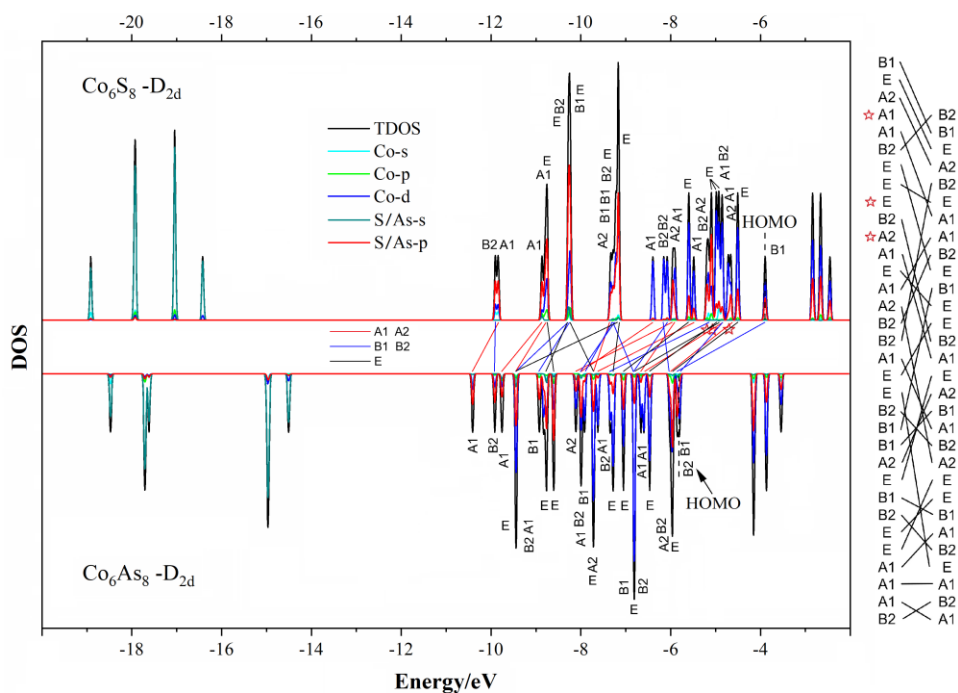

Fig. S4. Total and partial DOS (FWHM= 0.07) of  $\text{Co}_6\text{S}_8$  and  $\text{Co}_6\text{As}_8$  cores with  $D_{2d}$  symmetry.

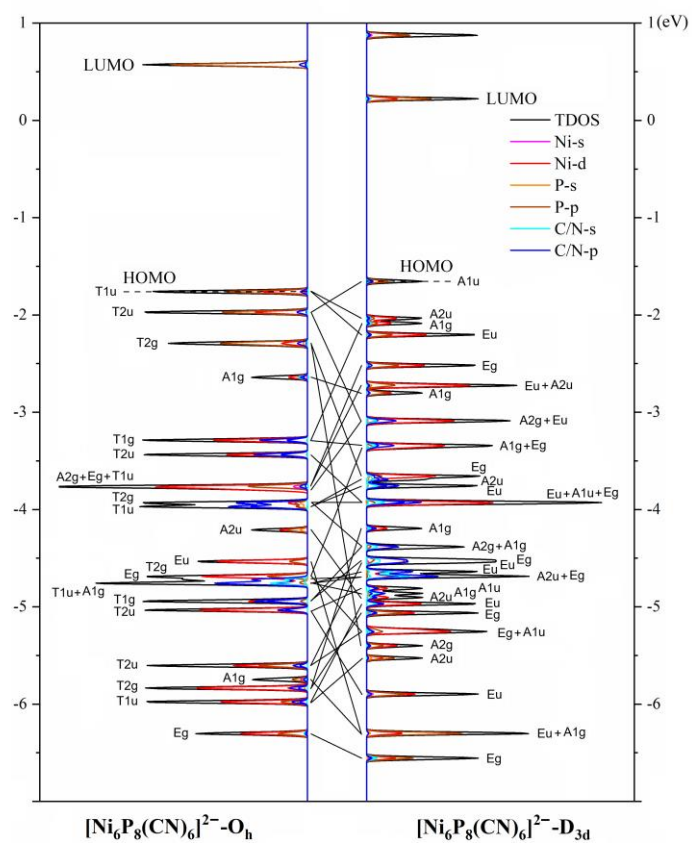

**Fig. S5.** Total and partial DOS (FWHM= 0.03) of the  $\text{O}_h$  and  $\text{D}_{3d}$  structures of  $[\text{Ni}_6\text{P}_8(\text{CN})_6]^{2-}$ .

**Table S1.** Comparison of the B3LYP/Def2-TZVP, PBE0/Def2-TZVP and CCSD/Def2-TZVP results.

|                                                           | $E_b$  |        |        | Gap   |      |      |
|-----------------------------------------------------------|--------|--------|--------|-------|------|------|
|                                                           | B3LYP  | PBE0   | CCSD   | B3LYP | PBE0 | CCSD |
| $\text{Co}_6\text{S}_8^--\text{O}_h$                      | -41.63 | -43.98 | -37.63 | 0.55  | 0.67 | 2.65 |
| $\text{Co}_6\text{S}_8-\text{D}_{3d}$                     | -36.91 | -39.00 | -33.43 | 1.82  | 2.24 | 5.34 |
| $\text{Co}_6\text{P}_8-\text{D}_{2d}$                     | -34.68 | -35.89 | -29.19 | 1.41  | 1.07 | 5.29 |
| $\text{Co}_6\text{As}_8-\text{D}_{2d}$                    | -30.52 | -31.64 | -27.66 | 1.65  | 1.99 | 4.09 |
| $\text{Rh}_6\text{P}_8-\text{O}_h$                        | -41.92 | -45.14 | -35.70 | 1.49  | 1.80 | 4.84 |
| $\text{Ni}_6\text{P}_8-\text{D}_{3d}$                     | -39.01 | -41.20 | -33.38 | 2.15  | 2.46 | 4.54 |
| $\text{Pt}_6\text{Sb}_8-\text{D}_{3d}$                    | -42.60 | -46.36 | -44.38 | 1.42  | 1.67 | 5.90 |
| $\text{Co}_6\text{S}_8(\text{CO})_6-\text{O}_h$           | -47.64 | -51.48 | -44.83 | 3.29  | 3.80 | 9.83 |
| $[\text{Co}_6\text{As}_8(\text{CN})_6]^{2-}-\text{O}_h$   | -58.81 | -61.09 | -55.16 | 1.48  | 1.81 | 2.48 |
| $[\text{Ni}_6\text{P}_8(\text{CN})_6]^{2-}-\text{D}_{3d}$ | -65.59 | -68.30 | -59.68 | 1.88  | 2.25 | 2.75 |

**Table S2.** Symmetries, bond lengths, binding energy  $E_b$  (eV) and HOMO-LUMO gap of  $[\text{M}_6\text{Q}_8(\text{CN})_6]^{0/2-}$  (M=Co, Rh, Ir; Q=P, As, Sb) calculated using B3LYP/Def2-TZVP.

|                                              | Symmetry               | $R_{\text{M-M}}$ | $R_{\text{M-Q}}$ | $R_{\text{Q-Q}}$ | $R_{\text{M-C}}$ | $E_b$  | Gap  |
|----------------------------------------------|------------------------|------------------|------------------|------------------|------------------|--------|------|
| $[\text{Co}_6\text{P}_8(\text{CN})_6]^{2-}$  | $\text{C}_2$           | 2.44~2.85        | 2.09~2.75        | 2.22~3.54        | 1.87~1.90        | -63.37 | 1.94 |
| $\text{Co}_6\text{P}_8(\text{CN})_6$         | $\text{C}_2$           | 2.60~2.89        | 2.11~2.35        | 2.19~3.02        | 1.84~1.86        | -55.67 | 1.78 |
| $[\text{Co}_6\text{As}_8(\text{CN})_6]^{2-}$ | $\text{C}_{2\text{h}}$ | 2.40/2.52/2.56   | 2.26~2.48        | 2.46~3.68        | 1.88/1.90        | -59.99 | 1.53 |
| $[\text{Co}_6\text{As}_8(\text{CN})_6]^{2-}$ | $\text{O}_\text{h}$    | 2.50             | 2.34             | 3.30             | 1.88             | -58.81 | 1.49 |
| $\text{Co}_6\text{As}_8(\text{CN})_6$        | $\text{D}_{4\text{h}}$ | 2.43/2.59        | 2.32/2.39        | 3.17/3.38        | 1.87/1.88        | -51.23 | 1.46 |
| $[\text{Co}_6\text{Sb}_8(\text{CN})_6]^{2-}$ | $\text{C}_{2\text{h}}$ | 2.49~2.63        | 2.43~2.64        | 2.84~3.92        | 1.88/1.91        | -56.52 | 1.44 |
| $[\text{Rh}_6\text{P}_8(\text{CN})_6]^{2-}$  | $\text{C}_2$           | 2.71~2.90        | 2.19~2.86        | 2.21~3.85        | 1.99~2.02        | -74.42 | 1.80 |
| $[\text{Rh}_6\text{P}_8(\text{CN})_6]^{2-}$  | $\text{O}_\text{h}$    | 2.68             | 2.41             | 3.39             | 2.02             | -70.68 | 1.67 |
| $\text{Rh}_6\text{P}_8(\text{CN})_6$         | $\text{D}_{4\text{h}}$ | 2.64/2.74        | 2.39/2.42        | 3.30/3.42        | 2.00/2.02        | -61.82 | 1.04 |
| $[\text{Rh}_6\text{As}_8(\text{CN})_6]^{2-}$ | $\text{C}_2$           | 2.77~2.89        | 2.30~2.83        | 2.45~3.99        | 1.98~2.03        | -71.14 | 1.81 |
| $[\text{Rh}_6\text{As}_8(\text{CN})_6]^{2-}$ | $\text{O}_\text{h}$    | 2.72             | 2.50             | 3.52             | 2.01             | -69.38 | 1.58 |
| $[\text{Rh}_6\text{Sb}_8(\text{CN})_6]^{2-}$ | $\text{C}_{2\text{h}}$ | 2.73/2.82/2.94   | 2.56~2.77        | 2.91~3.96        | 1.99/2.02        | -68.11 | 1.42 |
| $[\text{Rh}_6\text{Sb}_8(\text{CN})_6]^{2-}$ | $\text{O}_\text{h}$    | 2.81             | 2.65             | 3.75             | 2.00             | -67.80 | 1.36 |
| $[\text{Ir}_6\text{P}_8(\text{CN})_6]^{2-}$  | $\text{C}_2$           | 2.73~2.92        | 2.21~2.98        | 2.17~3.89        | 1.99/2.05        | -83.90 | 1.82 |
| $[\text{Ir}_6\text{P}_8(\text{CN})_6]^{2-}$  | $\text{O}_\text{h}$    | 2.70             | 2.44             | 3.44             | 2.02             | -81.93 | 2.24 |
| $\text{Ir}_6\text{P}_8(\text{CN})_6$         | $\text{D}_{4\text{h}}$ | 2.68/2.76        | 2.42/2.45        | 3.36/3.46        | 2.01/2.03        | -73.00 | 0.94 |
| $[\text{Ir}_6\text{As}_8(\text{CN})_6]^{2-}$ | $\text{O}_\text{h}$    | 2.75             | 2.53             | 3.57             | 2.01             | -80.07 | 2.13 |
| $[\text{Ir}_6\text{Sb}_8(\text{CN})_6]^{2-}$ | $\text{O}_\text{h}$    | 2.83             | 2.69             | 3.80             | 2.01             | -77.90 | 1.86 |

**Table S3.** Symmetries, bond lengths, binding energy  $E_b$  (eV) and HOMO-LUMO gap of  $[M_6Q_8(CN)_6]^{0/2-}$  (M=Ni, Pd, Pt; Q=P, As, Sb) calculated using B3LYP/Def2-TZVP.

|                         | Symmetry        | $R_{M-M}$ | $R_{M-Q}$      | $R_{Q-Q}$      | $R_{M-C}$ | $E_b$  | Gap  |
|-------------------------|-----------------|-----------|----------------|----------------|-----------|--------|------|
| $[Ni_6P_8(CN)_6]^{2-}$  | D <sub>3d</sub> | 2.67      | 2.22/2.23      | 2.25/3.30      | 1.90      | -65.59 | 1.88 |
| $Ni_6P_8(CN)_6$         | D <sub>3d</sub> | 2.66      | 2.24/2.28      | 2.22/3.11      | 1.87      | -56.86 | 1.45 |
| $[Ni_6As_8(CN)_6]^{2-}$ | D <sub>3d</sub> | 2.76      | 2.32/2.34      | 2.49/3.58      | 1.90      | -61.84 | 1.81 |
| $[Ni_6Sb_8(CN)_6]^{2-}$ | D <sub>2d</sub> | 2.71/2.81 | 2.55/2.56      | 3.07/3.61      | 1.85      | -59.98 | 2.35 |
| $[Ni_6Sb_8(CN)_6]^{2-}$ | D <sub>3</sub>  | 2.70/2.86 | 2.53/2.55/2.56 | 3.03/3.62/3.99 | 1.85      | -59.94 | 2.41 |
| $[Pd_6P_8(CN)_6]^{2-}$  | D <sub>3d</sub> | 2.89      | 2.38/2.39      | 2.27/3.40      | 2.05      | -64.14 | 1.50 |
| $Pd_6P_8(CN)_6$         | D <sub>3d</sub> | 2.91      | 2.37/2.49      | 2.23/3.23      | 2.01      | -55.74 | 1.63 |
| $[Pd_6As_8(CN)_6]^{2-}$ | D <sub>3d</sub> | 2.98      | 2.48/2.49      | 2.49/3.65      | 2.04      | -61.35 | 1.53 |
| $[Pd_6Sb_8(CN)_6]^{2-}$ | D <sub>3d</sub> | 3.14      | 2.64/2.66      | 2.86/4.03      | 2.04      | -59.11 | 1.52 |
| $[Pt_6P_8(CN)_6]^{2-}$  | D <sub>3</sub>  | 2.80/3.06 | 2.34/2.43/2.44 | 2.30/3.47      | 2.01      | -74.48 | 1.91 |
| $Pt_6P_8(CN)_6$         | D <sub>3</sub>  | 2.84/3.11 | 2.35/2.40/2.51 | 2.26/3.33      | 1.99      | -66.28 | 1.77 |
| $[Pt_6As_8(CN)_6]^{2-}$ | D <sub>3</sub>  | 2.84/3.23 | 2.46/2.52/2.56 | 2.54/3.76      | 2.01      | -71.48 | 1.97 |
| $[Pt_6Sb_8(CN)_6]^{2-}$ | D <sub>3</sub>  | 3.03/3.45 | 2.65/2.70      | 2.91/4.15      | 2.01      | -69.50 | 1.92 |
